# Supplementary material for: Rokitansky diverticulum with esophageo-spinal fistula leading to infective spondylodisciitis – A case report and review of literature
Source: Research Square preprint supplement (doi:10.21203/rs.3.rs-564345/v1), 2021-06-07

CARE Checklist of information to include when writing a case report

Topic

Item Checklist item description

Reported on Line

Title

1

The diagnosis or intervention of primary focus followed by the words “case report” . . . . . . . . . . . . . . . . . . . . . . . . . .

Key Words

2

2 to 5 key words that identify diagnoses or interventions in this case report, including "case report" . . .

3a

3b

3c

3d

4

Introduction: What is unique about this case and what does it add to the scientific literature? . . . . . . . . . . . . . . . .

Abstract

(no references)

Main symptoms and/or important clinical findings . . . . . . . . . . . . . . . . . . . . . . . . . . . . . . . . . . . . . . . . . . . . . . . . . . . . . . .

The main diagnoses, therapeutic interventions, and outcomes . . . . . . . . . . . . . . . . . . . . . . . . . . . . . . . . . . . . . . . . . . .

Conclusion—What is the main “take-away” lesson(s) from this case? . . . . . . . . . . . . . . . . . . . . . . . . . . . . . . . . . . . . .

One or two paragraphs summarizing why this case is unique (may include references) . . . . . . . . . . . .

De-identified patient specific information. . . . . . . . . . . . . . . . . . . . . . . . . . . . . . . . . . . . . . . . . . . . . . . . . . . .

Primary concerns and symptoms of the patient. . . . . . . . . . . . . . . . . . . . . . . . . . . . . . . . . . . . . . . . . . . . . . . . . . . . .

Medical, family, and psycho-social history including relevant genetic information . . . . . . . . . . . . . . . . .

Relevant past interventions with outcomes . . . . . . . . . . . . . . . . . . . . . . . . . . . . . . . . . . . . . . . . . . . . . . . . . . . . . . . .

Describe significant physical examination (PE) and important clinical findings. . . . . . . . . . . . . . . . . . . . . . .

Introduction

Patient Information

5a

5b

5c

5d

6

Clinical Findings

Timeline

7

Historical and current information from this episode of care organized as a timeline . . . . . . . . . . . . . . .

Diagnostic testing (such as PE, laboratory testing, imaging, surveys). . . . . . . . . . . . . . . . . . . . . . . . . . . . . . .

Diagnostic

Assessment

8a

8b

8c

8d

9a

9b

9c

Diagnostic challenges (such as access to testing, financial, or cultural) . . . . . . . . . . . . . . . . . . . . . . . . . . . . .

Diagnosis (including other diagnoses considered) . . . . . . . . . . . . . . . . . . . . . . . . . . . . . . . . . . . . . . . . . . . . . . . . .

Prognosis (such as staging in oncology) where applicable . . . . . . . . . . . . . . . . . . . . . . . . . . . . . . . . . . . . . . . . .

Types of therapeutic intervention (such as pharmacologic, surgical, preventive, self-care) . . . . . . . . . . . . . . . . . . . .

Administration of therapeutic intervention (such as dosage, strength, duration) . . . . . . . . . . . . . . . . . . . . . . . . . . . . .

Changes in therapeutic intervention (with rationale) . . . . . . . . . . . . . . . . . . . . . . . . . . . . . . . . . . . . . . . . . . . . . . . . . . . .

Therapeutic

Intervention

Follow-up and

Outcomes

10a Clinician and patient-assessed outcomes (if available) . . . . . . . . . . . . . . . . . . . . . . .. . . . . . . . . . . . . . . . . . . . . . . . . . . .

10b Important follow-up diagnostic and other test results . . . . . . . . . . . . . . . . . . . . . . . . . . . . . . . . . . . . . . . . . . . . . . . . . . . .

10c Intervention adherence and tolerability (How was this assessed?) . . . . . . . . . . . . . . . . . . . . . . . . . . . . . . . . . . . . . . . . .

10d Adverse and unanticipated events . . . . . . . . . . . . . . . . . . . . . . . . . . . . . . . . . . . . . . . . . . . . . . . . . . . . . . . . . . . . . . . . . . .

Discussion

11a

A scientific discussion of the strengths AND limitations associated with this case report . . . . . . . . . . . . . . . . . . . . . . .

11b Discussion of the relevant medical literature with references. . . . . . . . . . . . . . . . . . . . . . . . . . . . . . . . . . . . . . . . . .

11c The scientific rationale for any conclusions (including assessment of possible causes) . . . . . . . . . . . . . . . . . . . . . . . .

11d The primary “take-away” lessons of this case report (without references) in a one paragraph conclusion . . . . . . .

Patient Perspective

Informed Consent

12

13

The patient should share their perspective in one to two paragraphs on the treatment(s) they received . . . . . . . .

Did the patient give informed consent? Please provide if requested . . . . . . . . . . . . . . . . . . . . . . . . . . . . . . . . . . . . . .

Yes

No


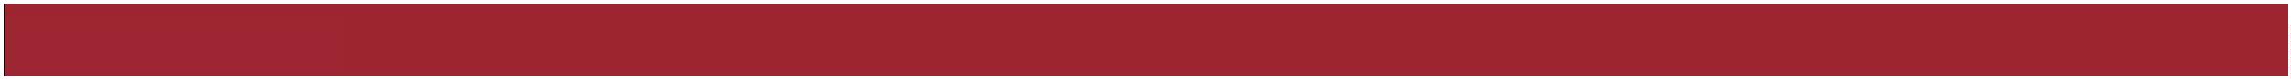

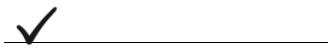

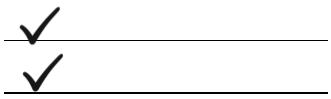

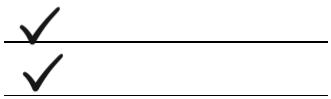

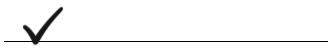

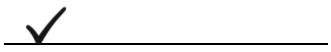

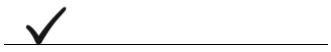

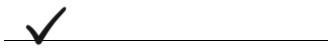

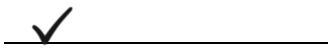

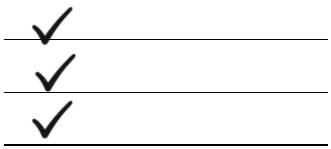

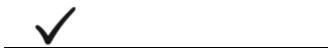

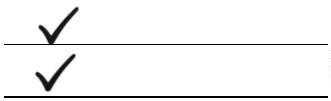

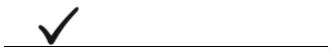

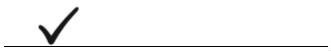

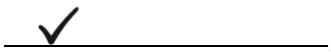

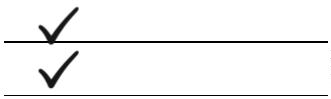

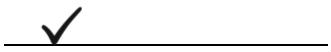

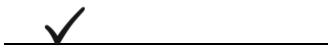

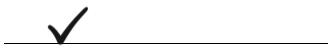

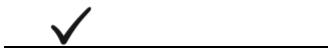

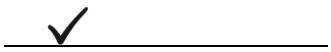

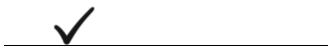

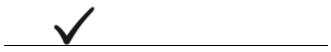

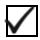

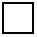

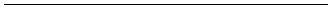

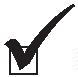

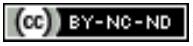

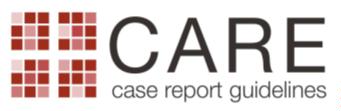

Supplement: Supplementary file 1 [file bdc5d48d29fd6078fd50a63e.docx]
